# Supplementary material for: Association between Self-Classification of COVID-19 Risk Levels and Adverse Lifestyle Changes among Physically Active Older Adults Following the Coronavirus Outbreak
Source: MDPI journal article supplement (doi:10.3390/ijerph19127039), 2022-06-08
Supplement: s1 [file ijerph-1698644-supplementary.pdf › ijerph-1698644-supplementary.pdf]

### Supplementary Materials

**Table S1.** Comparison of sex and age distribution between the study sample and the total older adult population of members of a health club chain.

| Characteristic     | Study sample | All older adult<br>(age ≥ 65 years)<br>health club chain<br>members | <i>p</i> - Value |
|--------------------|--------------|---------------------------------------------------------------------|------------------|
| N                  | 1,670        | 19,160                                                              |                  |
| Sex, <i>n</i> (%)  |              |                                                                     | <0.001           |
| Female             | 959 (57.4)   | 10,154 (53.0)                                                       |                  |
| Male               | 706 (42.3)   | 9,006 (47.0)                                                        |                  |
| Age (y), Mean ± SD | 71.0 ± 4.5   | 71.8 ± 5.2                                                          | 0.21             |
